# Supplementary material for: Recurrence and Complication Rates of Surgical Treatment for Blount’s Disease in Children: A Systematic Review and Meta-Analysis
Source: MDPI journal article supplement (doi:10.3390/jcm12206495), 2023-10-12
Supplement: s1 [file s1]

## **SUPPLEMENTARY MATERIALS**

| Study                                        | Knees (N)  | Age (range) | Langensk.  | MADz      | MADmm     | HKA        | aTFA       | FC-TS        | LDFA     | LDTA      | MPDA       | mMPTA      | MDA        | PPTA      |
|----------------------------------------------|------------|-------------|------------|-----------|-----------|------------|------------|--------------|----------|-----------|------------|------------|------------|-----------|
| Alekberov et al., 2003                       | 69         | 3.2-17.8    |            |           |           |            | 69         |              |          |           |            |            |            |           |
| Amer et al. 2010                             | 22         | 8.0-14.0    | 22         |           |           | 22         |            |              |          |           |            |            |            |           |
| Andrade and Johnson., 2006                   | 27         | 5.0-10.0    | 27         |           |           | 27         |            |              |          |           |            |            |            |           |
| Bar-On et al., 2008                          | 4          | 6.9-9.1     | 4          |           |           | 4          |            |              |          |           |            | 4          |            |           |
| Baraka et al., 2021                          | 21         | 8.2-13.6    | 21         |           |           |            | 21         |              |          |           | 21         | 21         | 21         | 21        |
| Beck et al., 1987                            | 4          | 5.3-9.9     | 4          |           |           |            |            |              |          |           |            |            |            |           |
| Blount, 1937                                 | 7          | 4.0-14.0    |            |           |           |            |            |              |          |           |            |            |            |           |
| Cherkashin et al., 2015                      | 33         | 6.0-18.0    | 21         |           |           |            |            |              |          |           |            |            |            |           |
| Edwards et al., 2017                         | 8          | 6.6-10.6    | 8          |           | 8         |            |            |              | 8        |           | 8          | 8          |            |           |
| Eidelman et al., 2008                        | 10         | 13.0-17.0   |            |           | 10        |            |            |              |          |           |            | 10         |            | 10        |
| Gregosiewicz et al., 1989                    | 13         | 6.0-12.0    | 13         |           |           |            | 13         |              |          |           |            |            |            |           |
| Hayek et al., 2000                           | 13         | 2.8-5.1     | 13         |           |           |            | 13         |              |          |           |            |            |            |           |
| Heflin et al., 2016                          | 27         | 1.8-15.1    |            |           |           |            |            |              |          |           |            |            |            |           |
| Hefny et al., 2010                           | 12         | n.d.        | 12         |           |           |            | 12         | 12           |          |           | 12         |            |            |           |
| Hollman et al., 2015                         | 25         | 2.0-9.0     | 25         |           |           |            | 25         |              |          |           | 25         |            | 25         |           |
| Janoyer et al., 2007                         | 9          | 7.2-13.5    |            |           |           |            | 9          |              |          |           | 9          |            |            |           |
| Jones et al., 2003                           | 7          | 7.1-15.0    |            |           |           |            |            | 7            |          |           |            |            |            |           |
| Khanfour and El Rosasy, 2014                 | 31         | n.d.        | 31         |           |           |            | 31         |              |          |           |            |            |            |           |
| Langenskiöld et al., 1964                    | 85         | 2.0-18.5    |            |           |           |            |            |              |          |           |            |            |            |           |
| Laurencin et al., 1996                       | 8          | 12.0-16.3   |            |           |           |            |            |              |          |           |            |            |            |           |
| Maré et al., 2022                            | 18         | 2.9-11.8    | 7          | 18        |           |            | 18         |              |          |           | 18         |            | 18         |           |
| Martin et al., 1994                          | 11         | 3.1-14.3    | 8          |           |           |            | 11         |              |          |           |            |            |            |           |
| Medbö, 1964                                  | 29         | 3.0-17.0    |            |           |           |            |            |              |          |           |            |            |            |           |
| Miraj et al., 2019                           | 27         | 2.0-17.0    | 27         |           |           |            | 27         |              |          |           |            |            | 27         |           |
| Mousa, 2014                                  | 14         | 14.0-16.0   |            |           |           |            |            |              |          |           |            | 14         |            |           |
| Oto et al., 2012                             | 6          | 12.4-14.1   |            |           | 6         |            |            |              |          |           |            | 6          |            |           |
| Price et al., 1995                           | 34         | 3.3-16.2    | 14         |           |           | 31         | 34         |              |          |           | 34         |            |            |           |
| Rab, 1988                                    | 7          | 5.8-13.5    |            |           |           |            |            |              |          |           |            |            |            |           |
| Sachs et al., 2015                           | 24         | 12.0-18.0   |            |           | 24        |            |            |              |          | 24        |            | 24         |            | 24        |
| Schoenecker et al., 1992                     | 7          | 10.2-13.7   | 7          |           |           |            |            | 7            |          |           | 7          |            |            |           |
| Scott, 2012                                  | 18         | 2.9-8.7     |            |           |           | 18         |            |              |          |           |            |            |            |           |
| Stanitski et al., 1998                       | 10         | 11.9-16.1   |            |           |           |            |            |              |          |           |            |            |            |           |
| Tavares and Molinero, 2006                   | 4          | 6.2-10.2    |            |           |           |            |            |              |          |           |            |            |            |           |
| Tsibidakis et al., 2018                      | 24         | 3.0-14.0    |            |           |           |            | 24         |              |          |           |            | 24         | 24         |           |
| Wenger et al., 1984                          | 8          | 12.8-14.3   |            |           |           |            |            |              |          |           |            |            |            |           |
| <b>TOTAL</b>                                 | <b>676</b> |             | <b>264</b> | <b>18</b> | <b>48</b> | <b>102</b> | <b>307</b> | <b>26</b>    | <b>8</b> | <b>24</b> | <b>134</b> | <b>111</b> | <b>115</b> | <b>55</b> |
|                                              |            |             | Langensk.  | MADz      | MADmm     | HKA        | aTFA       | FC-TS        | LDFA     | LDTA      | MPDA       | mMPTA      | MDA        | PPTA      |
| <b>Correlation with recurrence (p-value)</b> |            |             | 0.240      | 0.382     | 0.499     | 0.802      | 0.812      | <b>0.013</b> | 0.071    | 0.553     | 0.244      | 0.244      | 0.832      | 0.320     |

**Table S1:** preoperative radiographic features evaluated by authors selected for raw data analysis in alphabetical order. N = number; Langensk. = Langenskiöld classification; MADz = mechanical axis distance (MAD) expressed in zone; MADmm = mechanical axis distance (MAD) expressed in millimetres; HKA = hip-knee-ankle angle; aTFA = anatomical tibio-femoral angle; FC-TS= angle between femoral condyles and tibial shaft; LDFA = lateral distal femoral angle; LDTA = lateral distal tibial angle; MPDA = medial plate depression angle, between medial tibial plate and lateral tibial plate; mMPTA = mechanical medial proximal tibial angle; MDA = metaphyso-diaphyseal angle or angle of Drennan-Levine; PPTA = posterior proximal tibial angle.

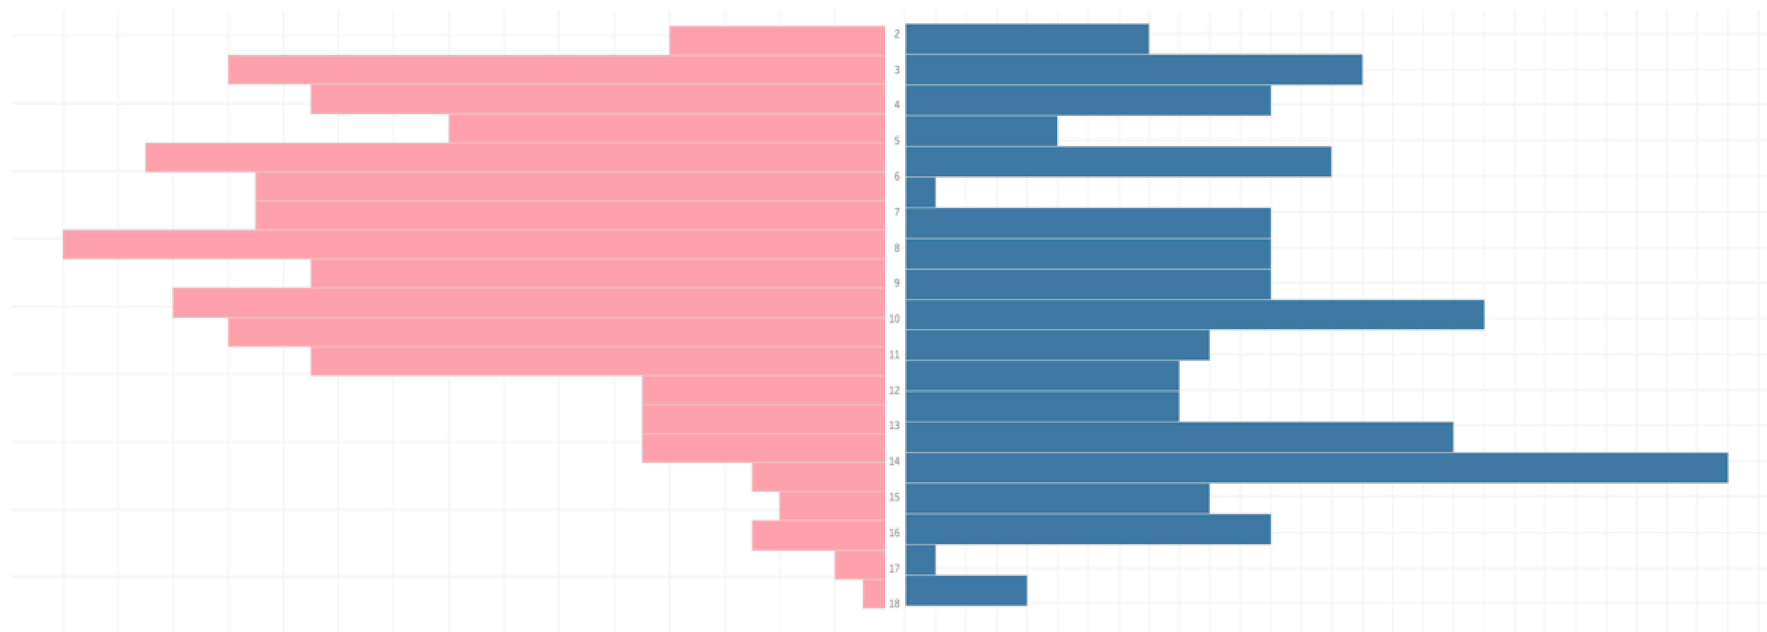

**Figure S1:** distribution of patients by age at surgery and sex. Females are depicted in pink, males in blue.

| Threshold regression model regions                                       | SSR for upper threshold | Recurrence % (95% C.I.) | <i>p</i> -value for region |
|--------------------------------------------------------------------------|-------------------------|-------------------------|----------------------------|
| <b>Follow-up</b>                                                         |                         |                         |                            |
| <1.7 years                                                               | 83.8                    | 13% (3–22%)             | 0.008                      |
| 1.7–2.5 years                                                            | 81.6                    | 47% (36–58%)            | 0.0001                     |
| 2.5–5.5 years                                                            | 80.0                    | 17% (9–24%)             | 0.0001                     |
| >5.5 years                                                               | -                       | 31% (25–38%)            | 0.0001                     |
| <b>Age at treatment in patients with at least 2.5 years of follow-up</b> |                         |                         |                            |
| <4.5 years                                                               | 63.9                    | 9% (5–18%)              | 0.039                      |
| 4.5–11.25 years                                                          | 67.8                    | 35% (30–41%)            | 0.0001                     |
| >11.25 years                                                             | -                       | 5% (0–12%)              | 0.111                      |

**Table S2:** results of STATA threshold regression models for follow-up and age at treatment. In the upper part of the table are shown thresholds found for recurrence rate by increasing follow-up. A peak of recurrences emerged before 2.5 years of follow-up, thus this value of follow-up should be sufficient to avoid underestimation of recurrences. In the lower part of the table are shown thresholds found for recurrence rate by varying age at treatment in patients with follow-up of 2.5 years or more.

| Authors                                      | Year | Technique                                 | Mean years of age at surgery (range) | Mean follow-up years (range) | Recurrence           | Complications (major) |
|----------------------------------------------|------|-------------------------------------------|--------------------------------------|------------------------------|----------------------|-----------------------|
| <b>Acute correction</b>                      |      |                                           |                                      |                              |                      |                       |
| Langenskiöld & Risika                        | 1964 | AC: single osteotomy                      | 7.6 (4.5 – 11.0)                     | 8.4 (3.3 – 15.8)             | 23/42 (55%)          | n.d.                  |
| Medbö                                        | 1964 | AC: single osteotomy                      | 7.7 (5.0 – 11.0)                     | 8.7 (3.0 – 13.0)             | 14/17 (82%)          | 5/17 (5)              |
| Gregosiewicz et al.                          | 1989 | AC: single osteotomy                      | 6.0                                  | 9.0                          | 1/1 (100%)           | 1/1 (1)               |
| Gregosiewicz et al.                          | 1989 | AC: MPE with graft + valgizing osteotomy  | 7.8 (6.0 – 10.0)                     | 8.6 (5.0 – 14.0)             | 2/10 (20%)           | 3/10 (1)              |
| Hayek et al.                                 | 2000 | AC: single osteotomy                      | 4.8 (4.5 – 5.2)                      | 2.5 (2.5 – 2.6)              | 0/2 (0%)             | 0/2 (0)               |
| Andrade & Johnston                           | 2006 | AC: MPE with cement + valgizing osteotomy | 7.1 (5.0 – 10.0)                     | 4.9 (2.5 – 7.1)              | 12/18 (67%)          | n.d.                  |
| <b>Total AC</b>                              |      |                                           | <b>7.4 (4.5 – 11.0)</b>              | <b>7.7 (2.5 – 15.8)</b>      | <b>52/90 (58%)**</b> | <b>9/30 (7)</b>       |
| <b>Acute correction + hemiepiphysiodesis</b> |      |                                           |                                      |                              |                      |                       |
| Tavares & Molinero                           | 2006 | AC: double osteotomy in two stages + hE   | 7.9 (6.2 – 9.6)                      | 3.0 (3.0 – 3.0)              | 0/2 (0%)             | 0/2 (0)               |
| Baraka et al.                                | 2021 | AC: double osteotomy + hE                 | 9.7 (8.2 – 11.1)                     | 5.3 (4.1 – 8.3)              | 0/16 (0%)            | n.d.                  |
| <b>Total AC + hE</b>                         |      |                                           | <b>9.5 (6.2 – 11.1)</b>              | <b>5.1 (3.0 – 8.3)</b>       | <b>0/18 (0%)</b>     | <b>0/2 (0)</b>        |
| <b>Gradual correction</b>                    |      |                                           |                                      |                              |                      |                       |
| Alekberov et al. *                           | 2003 | GC                                        | 8.4 (5.4 – 11.2)                     | 7.2 (3.5 – 14.8)             | 4/35 (11%)           | 2/35 (0)              |
| Jones et al.                                 | 2003 | GC                                        | 8.8 (7.1 – 10.9)                     | 3.4 (2.8 – 3.7)              | 2/3 (66%)            | 5/3 (2)               |
| Amer & Khanfour *                            | 2010 | GC                                        | 9.3 (8.0 – 10.0)                     | 3.3 (3.0 – 4.0)              | 5/9 (56%)            | 0/9 (0)               |
| Edwards et al.                               | 2017 | GC                                        | 9.5 (6.6 – 10.6)                     | 4.9 (2.9 – 9.0)              | 3/7 (43%)            | 5/7 (1)               |
| <b>Total GC</b>                              |      |                                           | <b>9.0 (5.8 – 12.0)</b>              | <b>6.1 (2.8 – 14.8)</b>      | <b>14/54 (26%)</b>   | <b>12/54 (3)</b>      |
| <b>Other techniques</b>                      |      |                                           |                                      |                              |                      |                       |
| Tavares & Molinero                           | 2006 | GC + hE                                   | 9.5 (8.8 – 10.2)                     | 3.5 (3.0 – 4.0)              | 0/2 (0%)             | 0/2 (0)               |
| Janoyer et al.                               | 2007 | GC + hE                                   | 8.6 (-)                              | 3.8 (-)                      | 0/1 (0%)             | 1/1 (0)               |
| Heflin et al.                                | 2016 | hE                                        | 5.4 (5.4 – 5.4)                      | 5.8 (5.8 – 5.8)              | 0/2 (0%)             | 0/2 (0)               |
| <b>Total other techniques</b>                |      |                                           | <b>8.3 (5.4 – 11.6)</b>              | <b>4.2 (3.0 – 5.8)</b>       | <b>0/5 (0%)</b>      | <b>1/5 (0)</b>        |
| <b>TOTAL</b>                                 |      |                                           | <b>8.1 (4.5 – 11.2)</b>              | <b>6.7 (2.5 – 15.8)</b>      | <b>66/169 (39%)</b>  | <b>22/91 (10)</b>     |

**Table S3:** recurrence rate and complications among patients aged between 4.5 and 11.25 years of age followed for 2.5 or more years. GC = gradual correction; AC = acute correction; hE = lateral hemiepiphysiodesis of proximal tibia; MPE = medial plate elevation. (\*) = authors that did not clearly differentiated ITV/LOTV diagnosis. (\*\*) = AC group showed a recurrence rate of 58%, with no statistically significant difference among double osteotomy (50%) and the single osteotomy (61%,  $p = 0.315$ ).

| Authors                       | Year | Technique            | Mean years of age at surgery (range) | Mean follow-up years (range) | Recurrence       | Complications (major) |
|-------------------------------|------|----------------------|--------------------------------------|------------------------------|------------------|-----------------------|
| <b>Acute correction</b>       |      |                      |                                      |                              |                  |                       |
| Blount                        | 1937 | AC: single osteotomy | 4.0 (4.0 – 4.0)                      | 0.5 (0.5 – 0.5)              | 0/2              | 0/2 (0)               |
| Langenskiöld & Risika         | 1964 | AC: single osteotomy | 3.0 (2.0 – 4.0)                      | 8.3 (1.0 – 13.8)             | 1/27 (4%)        | n.d.                  |
| Medbö                         | 1964 | AC: single osteotomy | 3.6 (3.0 – 4.0)                      | 15.7 (14.0 – 17.0)           | 2/7 (29%)        | 1/7 (1)               |
| Price et al.                  | 1995 | AC: single osteotomy | 3.5 (3.5 – 3.5)                      | 5.0 (5.0 – 5.0)              | 0/2 (0%)         | 0/2 (0)               |
| Hayek et al.                  | 2000 | AC: single osteotomy | 3.3 (2.8 – 4.2)                      | 10.2 (4.6 – 17.0)            | 0/11 (0%)        | 2/11 (0)              |
| Miraj et al.                  | 2019 | AC: single osteotomy | 3.5 (2.0 – 4.0)                      | 1.0 (1.0 – 1.0)              | 0/4              | 0/4 (0)               |
| <b>Total AC</b>               |      |                      | <b>3.3 (2.0 – 4.2)</b>               | <b>8.7 (0.5 – 17.0)</b>      | <b>3/53 (7%)</b> | <b>3/26 (1)</b>       |
| <b>Other techniques</b>       |      |                      |                                      |                              |                  |                       |
| Alekberov et al.*             | 2003 | GC                   | 3.3 (3.3 – 3.3)                      | 3.0 (2.9 – 3.3)              | 0/3 (0%)         | 1/3 (0)               |
| Heflin et al.                 | 2016 | hE                   | 2.0 (1.8 – 2.4)                      | 2.1 (1.2 – 3.6)              | 1/8 (13%)        | 1/8 (0)               |
| <b>Total other techniques</b> |      |                      | <b>2.3 (1.8 – 3.3)</b>               | <b>2.4 (1.2 – 3.6)</b>       | <b>1/11 (9%)</b> | <b>2/11 (0)</b>       |
| <b>TOTAL</b>                  |      |                      | <b>3.1 (1.8 – 4.2)</b>               | <b>7.6 (0.5 – 17.0)</b>      | <b>4/64 (6%)</b> | <b>5/37 (1)</b>       |

**Table S4:** recurrence rate and complications among patients aged below 4 years of age, with follow-up duration specified. GC = gradual correction; AC = acute correction; hE = lateral hemiepiphysestesis of proximal tibia; EF = external fixator. (\*) = authors that did not clearly differentiated ITV/LOTV diagnosis.

| Authors                                        | Year | Technique                                | Mean years of age at surgery (range) | Mean follow-up years (range) | Recurrence          | Complications (major) |
|------------------------------------------------|------|------------------------------------------|--------------------------------------|------------------------------|---------------------|-----------------------|
| <b>Acute correction</b>                        |      |                                          |                                      |                              |                     |                       |
| Blount                                         | 1937 | AC: single osteotomy                     | 13.3 (12.5 – 14.0)                   | 2.0 (2.0 – 2.0)              | 1/2 (50%)           | 0/2 (0)               |
| Langenskiöld & Risika                          | 1964 | AC: single osteotomy                     | 15.1 (12.5 – 18.5)                   | 4.2 (0.5 – 11.8)             | 2/4 (50%)           | n.d.                  |
| Medbö                                          | 1964 | AC: single osteotomy                     | 14.5 (12.0 – 17.0)                   | 4.0 (1.0 – 7.0)              | 0/2 (0%)            | 0/2 (0)               |
| Gregosiewicz et al.                            | 1989 | AC: MPE with graft + valgizing osteotomy | 12.0 (12.0 – 12.0)                   | 5.0 (4.0 – 6.0)              | 0/2 (0%)            | 1/2 (0)               |
| Mousa et al.                                   | 2014 | AC: local wedge transfer osteotomy       | 14.9 (14.0 – 16.0)                   | 1.0 (1.0 – 1.0)              | 1/14 (7%)           | 1/14 (0)              |
| Miraj et al.                                   | 2019 | AC: single osteotomy                     | 15.3 (12.0 – 17.0)                   | 1.0 (1.0 – 1.0)              | 0/3 (0%)            | 0/3 (0)               |
| <b>Total AC</b>                                |      |                                          | <b>14.6 (12.0 – 18.5)</b>            | <b>2.1 (0.5 – 11.8)</b>      | <b>4/27 (15%)</b>   | <b>2/23 (0)</b>       |
| <b>Acute correction + hemiepiphysiodesis</b>   |      |                                          |                                      |                              |                     |                       |
| Blount                                         | 1937 | AC: single osteotomy + hE                | 11.5 (-)                             | 2.0 (-)                      | 0/1                 | n.d.                  |
| Baraka et al.                                  | 2021 | AC: double osteotomy + hE                | 12.6 (11.6 – 13.6)                   | 3.7 (3.2 – 4.5)              | 0/5 (0%)            | n.d.                  |
| <b>Total AC + hE</b>                           |      |                                          | <b>12.4 (11.5 – 13.6)</b>            | <b>3.5 (2.0 – 2.5)</b>       | <b>0/6 (0%)</b>     | <b>n.d.</b>           |
| <b>Gradual correction</b>                      |      |                                          |                                      |                              |                     |                       |
| Stanitski et al.                               | 1998 | GC                                       | 13.6 (11.9 – 16.1)                   | 1.5 (0.8 – 2.6)              | 2/10 (20%)          | 4/10 (1)              |
| Alekberov et al.*                              | 2003 | GC                                       | 14.1 (11.4 – 17.8)                   | 6.4 (2.3 – 12.8)             | 2/29 (7%)           | 8/29 (0)              |
| Jones et al.                                   | 2003 | GC                                       | 13.5 (12.0 – 15.0)                   | 1.9 (1.7 – 2.2)              | 1/2 (50%)           | 3/2 (1)               |
| Eidelman et al.                                | 2008 | GC                                       | 14.7 (13.0 – 17.0)                   | 3.6 (3.6 – 3.6)              | 0/10 (0%)           | 10/10 (1)             |
| Amer & Khanfour*                               | 2010 | GC                                       | 12.7 (12.0 – 14.0)                   | 2.8 (2.0 – 4.0)              | 3/10 (30%)          | 0/6 (0)               |
| <b>Total GC</b>                                |      |                                          | <b>13.8 (11.4 – 17.8)</b>            | <b>4.4 (0.8 – 12.8)</b>      | <b>8/61 (13%)</b>   | <b>25/61 (3)</b>      |
| <b>Gradual correction + hemiepiphysiodesis</b> |      |                                          |                                      |                              |                     |                       |
| Jones et al.                                   | 2003 | GC + hE                                  | 11.4 (-)                             | 1.8 (-)                      | 0/1 (0%)            | 1/1 (0)               |
| Janoyer et al.                                 | 2007 | GC + hE                                  | 12.6 (11.6 – 13.5)                   | 2.6 (1.8 – 3.3)              | 1/2 (50%)           | 2/2 (0)               |
| <b>Total GC + hE</b>                           |      |                                          | <b>12.2 (11.4 – 13.5)</b>            | <b>2.3 (1.8 – 3.3)</b>       | <b>1/3 (33%)</b>    | <b>3/3 (0)</b>        |
| <b>Hemiepiphysiodesis</b>                      |      |                                          |                                      |                              |                     |                       |
| Oto et al.                                     | 2012 | hE                                       | 13.0 (12.4 – 14.8)                   | 2.0 (1.1 – 2.6)              | 6/6 (100%)          | 0/6 (0)               |
| Heflin et al.                                  | 2016 | hE                                       | 13.9 (12.7 – 15.1)                   | 2.2 (0.7 – 4.4)              | 0/13 (0%)           | 4/13 (0)              |
| <b>Total hE</b>                                |      |                                          | <b>13.6 (12.4 – 15.1)</b>            | <b>2.1 (0.7 – 4.4)</b>       | <b>6/19 (32%)</b>   | <b>4/19 (0)</b>       |
| <b>TOTAL</b>                                   |      |                                          | <b>13.9 (11.4 – 18.5)</b>            | <b>3.4 (0.5 – 12.8)</b>      | <b>19/116 (16%)</b> | <b>34/106 (3)</b>     |

**Table S5:** recurrence rate and complications among patients aged beyond 11.25 years of age, with follow-up duration specified. GC = gradual correction; AC = acute correction; hE = lateral hemiepiphysiodesis of proximal tibia; MPE = medial plate elevation. (\*) = authors that did not clearly differentiated ITV/LOT1V diagnosis.
